# Supplementary material
Source: PubMed Central journal article supplement (PMC4192008)
Supplement: NIHMS621502-supplement-S_Table_1.pdf [file NIHMS621502-supplement-S_Table_1.pdf]

# Supplementary Table 1

|                              | <b>African American</b> | <b>Caucasian</b> |
|------------------------------|-------------------------|------------------|
| <b>n: total(IUGR)</b>        | 19 (12)                 | 14 (7)           |
| <b>MA (yrs)</b>              | 24 (18-35)              | 23.5 (19-31)     |
| <b>GA (wks)</b>              | 29.5 (23.5-43)          | 28.7 (25-31.4)   |
| <b>Parity</b>                | 1 (0-4)                 | 0 (0-3)          |
| <b>Gravidity</b>             | 2 (1-7)                 | 1 (1-6)          |
| <b>BW (g)</b>                | 1085 (425)              | 903 (381.25)     |
| <b>BMI (kg/sq m)</b>         | 31.9 (15.9)             | 27.8 (4.9)       |
| <b>BP: Systolic (mm Hg)</b>  | 179 (24)                | 169.1 (13)       |
| <b>BP: Diastolic (mm Hg)</b> | 100 (17.5)              | 103 (12)         |
| <b>Proteinuria (mg/24h)</b>  | 2584 (3353)*            | 4946 (7700)**    |
