# Supplementary material
Source: PubMed Central journal article supplement (PMC4192008)
Supplement: NIHMS621502-supplement-S_Table_2.pdf [file NIHMS621502-supplement-S_Table_2.pdf]

# Supplementary Table 2

## qPCR Oligonucleotide Sequences

| Gene           | forward                       | reverse                        |
|----------------|-------------------------------|--------------------------------|
| Nkx2-5         | 5'-AGCTCTTTCTTTTCGGCTCTAGG-3' | 5'-CCCGCCTTCTATCCACGTG-3'      |
| sFlt1          | 5'-TTGGGACTGTGGGAAGAAAC-3'    | 5'-TTGGAGATCCGAGAGAAAACA-3'    |
| VEGFR1         | 5'-ATCATGAATGTTTCCCTGCAA-3'   | 5'-TGACAGTCTAAAGTGGTGGAACTG-3' |
| $\beta$ -actin | 5'-TCCCTGGAGAAGAGCTACGA-3'    | 5'-AGCACTGTGTTGGCGTACAG-3'     |
| Sam68          | 5'-TGCAGAATCCCAAAGTAGGC-3'    | 5'-TAAGATTCAACCGCCATGTG-3'     |
| Xbp1           | 5'-ACTGGGTCCAAGTTGTCCAG-3'    | 5'-CTGCTGAGTCCGCAGCAC-3'       |
| Ccdc117        | 5'-GCGCAGTCCCTAGCAGTC-3'      | 5'-GACAATCATCATCCTCCTCCTC-3'   |
